# Supplementary material for: A pipeline‐friendly software tool for genome diagnostics to prioritize genes by matching patient symptoms to literature
Source: PubMed Central journal article supplement (PMC9744518; doi:10.1002/ggn2.10023), 2020-08-10
Supplement: GGN2-1-e10023-s002.pdf [file GGN2-1-e10023-s002.pdf]

**Supplementary File 1**, part of “A pipeline-friendly software tool for genome diagnostics to prioritize genes by matching patient symptoms to literature” (van der Velde *et al.* 2020)

The benchmark data consists of phenotypes and causal genes reported by Trujillano *et al.* (doi: 10.1038/ejhg.2016.146) and was retrieved from:

<https://www.ncbi.nlm.nih.gov/pmc/articles/PMC5255946/bin/ejhg2016146x3.docx>.

Alternative download location at publisher’s website: [https://static-](https://static-content.springer.com/esm/art%3A10.1038%2Ffejhg.2016.146/MediaObjects/41431_2017_BFejhg2016146_MOESM18_ESM.docx)

[content.springer.com/esm/art%3A10.1038%2Ffejhg.2016.146/MediaObjects/41431\\_2017\\_BFejhg2016146\\_MOESM18\\_ESM.docx](https://static-content.springer.com/esm/art%3A10.1038%2Ffejhg.2016.146/MediaObjects/41431_2017_BFejhg2016146_MOESM18_ESM.docx).

Because the dataset could not easily be used for application benchmarking in its retrieved form, several adjustments were made. First, it was converted into a TSV file by copy-pasting the whole table from LibreOffice Writer to Calc. After this, adjustments to the data itself were made. All columns except for the LOVD, gene, OMIM info, significance and HPO terms were removed. For LOVDs with multiple genes, a separate line per gene was created with all the other information being duplicated. If an LOVD had separate information for the mother and father, the highest significance was kept (as columns with unique information regarding the father and mother were already excluded). Note that this information was not used in the tool benchmark itself. After this, multiple regular expressions were used within Atom to replace a certain string of characters with another. The regular expression " ?\t ?" was used with the replacement regular expression "\t" and then the regular expression "(\tL?P\t.+), ?" was used multiple times (until no more replacements could be made) with the replacement regular expression "\$1;". As these replacements also replaced characters within phenotype names, affected terms were restored back to their original name (see Table 1). HPO terms within the data that were obsolete or that did not occur within the HPO database (for example due to using abbreviations) were replaced with their correct terms (see Table 2). For consistency, LOVD 00080824 and 00081069 were removed so that all used LOVDs had an OMIM code (as these two used a PMID code instead). Finally, the header was renamed from "LOVD patient ID\tGene\tOMIM description\_new/Pubmed Description (OMIM/Pubmed Id)\tSignificance\tHPO terms" to "lovd\tgene\tomim\tsignificance\tthpo\_terms".

**Table 1**

| <b>HPO term reported by Trujillano <i>et al.</i> as affected by regular expression</b> | <b>Restored HPO term</b>                           |
|----------------------------------------------------------------------------------------|----------------------------------------------------|
| Intellectual disability;severe                                                         | Intellectual disability, severe                    |
| Spontaneous;recurrent epistaxis                                                        | Spontaneous, recurrent epistaxis                   |
| Primitive reflexes (palmomental;snout;glabellar)                                       | Primitive reflexes (palmomental, snout, glabellar) |
| High;narrow palate                                                                     | High, narrow palate                                |

**Table 2**

| <b>HPO term reported by Trujillano <i>et al.</i></b> | <b>HPO term chosen as benchmark input</b>        | <b>Explanation</b>                                                  |
|------------------------------------------------------|--------------------------------------------------|---------------------------------------------------------------------|
| Enlarged kidneys                                     | Enlarged kidney                                  | singular form is used in HPO                                        |
| Platyspondyly (childhood)                            | Platyspondyly                                    | old name is obsolete and replaced with new name                     |
| Abnormality of the lung                              | Abnormality of the lungs                         | plural form is stored as synonym                                    |
| Prominent epicanthal folds                           | Epicanthus                                       | old name is obsolete and replaced with new name                     |
| febrile seizures                                     | Febrile seizures                                 | first character to uppercase (1 of 3 occurrences did not have this) |
| Decreased activity of m complex IV                   | Decreased activity of mitochondrial complex IV   | used official name without abbreviation of "mitochondrial" to "m"   |
| Abnormality of cardiac atrium                        | Abnormality of cardiac atrium morphology         | very similar to known synonym                                       |
| Abnormality of the globus pallidus                   | Abnormal globus pallidus morphology              | very similar to known HPO name                                      |
| Dilatation of the ascending aorta                    | Ascending tubular aorta aneurysm                 | old name is obsolete and replaced with new name                     |
| Primitive reflexes (palmomental, snout, glabellar)   | Palmomental reflex;Snout reflex;Glabellar reflex | split up into individual names                                      |
| m respiratory chain defects                          | Mitochondrial respiratory chain defects          | used official name without abbreviation of "mitochondrial" to "m"   |
| Abnormality of m metabolism                          | Abnormality of mitochondrial metabolism          | used official name without abbreviation of "mitochondrial" to "m"   |
| m myopathy                                           | Mitochondrial myopathy                           | used official name without abbreviation of "mitochondrial" to "m"   |
| Abnormality of the coronary arteries                 | Abnormal coronary artery morphology              | very similar to known HPO name                                      |
